# Supplementary material for: Regulation of ammonium loss under contrasting upwelling conditions: sensitivity of Feammox to environmental drivers
Source: Royal Society of Chemistry journal article supplement (doi:10.1039/d5em00257e), 2025-11-19
Supplement: d5em00257e1.xlsx [file d5em00257e1.xlsx]

## Sheet: Bare
Bare: final results
		Original sample (O)	Sample mean (M)	Standard deviation (STDEV)	T statistics (|O/STDEV|)	P values		Abbreviation	Construct
Path coefficients	FeRR -> Feammox	0.769	0.742	0.131	5.86	0		FeRR	Fe reduction rate
	SC -> Feammox	0.189	0.216	0.164	1.151	0.25		SC	Sediment characteristics
	SC -> FeRR	0.652	0.658	0.206	3.163	0.002		UI	Upwelling influence
	UI -> SC	0.665	0.662	0.302	2.203	0.028
Total indirect effects	SC -> Feammox	0.501	0.487	0.18	2.793	0.005		p-value color	Interval
	UI -> Feammox	0.459	0.464	0.246	1.871	0.061		Green	p ≤ 0.05
	UI -> FeRR	0.434	0.434	0.246	1.765	0.078		Blue	0.05 < p ≤ 0.09
Specific indirect effects	UI -> SC -> FeRR	0.434	0.434	0.246	1.765	0.078		Red	p ≥ 1.00
	UI -> SC -> Feammox	0.126	0.134	0.133	0.946	0.344
	SC -> FeRR -> Feammox	0.501	0.487	0.18	2.793	0.005
	UI -> SC -> FeRR -> Feammox	0.334	0.33	0.195	1.715	0.086
Total effects	FeRR -> Feammox	0.769	0.742	0.131	5.86	0
	SC -> Feammox	0.691	0.703	0.192	3.598	0
	SC -> FeRR	0.652	0.658	0.206	3.163	0.002
	UI -> Feammox	0.459	0.464	0.246	1.871	0.061
	UI -> FeRR	0.434	0.434	0.246	1.765	0.078
	UI -> SC	0.665	0.662	0.302	2.203	0.028
Outer loadings	BEUTI -> UI	-0.154	-0.084	0.452	0.34	0.734
	Temp -> UI	0.479	0.377	0.449	1.067	0.286
	Fe(III) <- SC	0.751	0.729	0.181	4.158	0
	Mn(IV) <- SC	0.744	0.625	0.367	2.027	0.043
	FeAm <- Feammox	1	1	0	n/a	n/a
	FeRR -> FeRR	1	1	0	n/a	n/a
	Urea <- SC	0.862	0.779	0.248	3.48	0.001
	CCHOt <- SC	0.822	0.8	0.169	4.871	0
	C:N <- SC	0.194	0.161	0.29	0.671	0.502
	Moisture <- SC	0.746	0.632	0.372	2.004	0.045
Outer weights	BEUTI -> UI	2.589	2.098	1.244	2.081	0.037
	Temp -> UI	2.915	2.337	1.298	2.247	0.025
	Fe(III) <- SC	0.273	0.273	0.096	2.845	0.004
	Mn(IV) <- SC	0.168	0.121	0.15	1.122	0.262
	FeAm <- Feammox	1	1	0	n/a	n/a
	FeRR -> FeRR	1	1	0	n/a	n/a
	Urea <- SC	0.312	0.279	0.086	3.638	0
	CCHOt <- SC	0.298	0.294	0.079	3.761	0
	C:N <- SC	-0.002	0.001	0.116	0.018	0.986
	Moisture <- SC	0.21	0.158	0.153	1.369	0.171
Bare: Quality criteria
R2		Original sample (O)	Sample mean (M)	Standard deviation (STDEV)	T statistics (|O/STDEV|)	P values
	FeRR	0.425	0.475	0.171	2.484	0.013
	Feammox	0.817	0.83	0.068	12.073	0
	SC	0.443	0.529	0.171	2.592	0.01
R2 adj	FeRR	0.389	0.442	0.182	2.141	0.032
	Feammox	0.792	0.807	0.077	10.333	0
	SC	0.408	0.5	0.181	2.248	0.025
f2	FeRR -> Feammox	1.852	1.991	1.372	1.35	0.177
	SC -> FeRR	0.74	1.141	0.85	0.871	0.384
	SC -> Feammox	0.112	0.288	0.45	0.249	0.803
	UI -> SC	0.794	1.503	1.363	0.583	0.56
AVE	Feammox	1	1	0	n/a	n/a
	SC	0.522	0.512	0.098	5.333	0
CR: rho_c	Feammox	1	1	0	n/a	n/a
	SC	0.855	0.797	0.183	4.671	0
CR: rho_a	FeRR	1	1	0	n/a	n/a
	Feammox	1	1	0	n/a	n/a
	SC	0.868	0.836	0.118	7.375	0
	UI	1	1	0	n/a	n/a
alfa cronbach	Feammox	1	1	0	n/a	n/a
	SC	0.807	0.791	0.074	10.906	0
Latent variable correlations	Feammox <-> FeRR	0.892	0.889	0.045	19.926	0
	SC <-> FeRR	0.652	0.658	0.206	3.163	0.002
	SC <-> Feammox	0.691	0.703	0.192	3.598	0
	UI <-> FeRR	0.179	0.239	0.304	0.587	0.557
	UI <-> Feammox	0.207	0.267	0.249	0.83	0.407
	UI <-> SC	0.665	0.662	0.302	2.203	0.028
HTMT		Original sample (O)	Sample mean (M)	0.025	0.975
	SC <-> Feammox	0.635	0.681	0.477	0.882
Bare: Model fit
		Original sample (O)	Sample mean (M)	0.95	0.99
SRMR	Saturated model	0.243	0.115	0.164	0.201
	Estimated model	0.251	0.115	0.165	0.203
d_ULS	Saturated model	3.241	0.768	1.482	2.218
	Estimated model	3.478	0.776	1.504	2.264
d_G	Saturated model	2.206	n/a	n/a	n/a
	Estimated model	2.239	n/a	n/a	n/a

## Sheet: Seagrass
Seagrass: final results
		Original sample (O)	Sample mean (M)	Standard deviation (STDEV)	T statistics (|O/STDEV|)	P values		Abbreviation	Construct
Path coefficients	FeRR -> Feammox	0.671	0.653	0.104	6.456	0		FeRR	Fe reduction rate
	SC -> FeRR	0.745	0.749	0.092	8.087	0		SC	Sediment characteristics
	SC -> Feammox	0.348	0.365	0.106	3.282	0.001		UI	Upwelling influence
	UI -> SC	0.872	0.885	0.052	16.795	0
Total indirect effects	SC -> Feammox	0.5	0.487	0.094	5.31	0		p-value color	Interval
	UI -> FeRR	0.65	0.664	0.097	6.726	0		Green	p ≤ 0.05
	UI -> Feammox	0.74	0.755	0.078	9.502	0		Blue	0.05 < p ≤ 0.09
Specific indirect effects	UI -> SC -> FeRR	0.65	0.664	0.097	6.726	0		Red	p ≥ 1.00
	UI -> SC -> Feammox	0.303	0.324	0.098	3.111	0.002
	SC -> FeRR -> Feammox	0.5	0.487	0.094	5.31	0
	UI -> SC -> FeRR -> Feammox	0.436	0.431	0.088	4.967	0
Total effects	FeRR -> Feammox	0.671	0.653	0.104	6.456	0
	SC -> FeRR	0.745	0.749	0.092	8.087	0
	SC -> Feammox	0.848	0.853	0.064	13.275	0
	UI -> FeRR	0.65	0.664	0.097	6.726	0
	UI -> Feammox	0.74	0.755	0.078	9.502	0
	UI -> SC	0.872	0.885	0.052	16.795	0
Outer loadings	BEUTI -> UI	-0.551	-0.528	0.21	2.63	0.009
	Temp -> UI	0.801	0.794	0.108	7.433	0
	Fe(III) <- SC	0.829	0.837	0.074	11.267	0
	Mn(IV) <- SC	0.456	0.444	0.228	2.003	0.045
	FeAm <- Feammox	1	1	0	n/a	n/a
	FeRR <- FeRR	1	1	0	n/a	n/a
	NrS1 <- SC	0.797	0.779	0.122	6.505	0
	OMS1 <- SC	0.885	0.882	0.054	16.493	0
	Moisture <- SC	0.923	0.915	0.06	15.252	0
Outer weights	BEUTI -> UI	1.764	1.694	0.429	4.112	0
	Temp -> UI	2.461	2.376	0.421	5.848	0
	Fe(III) <- SC	0.314	0.314	0.039	8.031	0
	Mn(IV) <- SC	0.159	0.157	0.057	2.779	0.005
	FeAm <- Feammox	1	1	0	n/a	n/a
	FeRR <- FeRR	1	1	0	n/a	n/a
	NrS1 <- SC	0.215	0.212	0.038	5.698	0
	OMS1 <- SC	0.265	0.263	0.031	8.485	0
	Moisture <- SC	0.284	0.279	0.029	9.68	0
Seagrass: quality criteria
R2		Original sample (O)	Sample mean (M)	Standard deviation (STDEV)	T statistics (|O/STDEV|)	P values
	FeRR	0.555	0.569	0.121	4.599	0
	Feammox	0.919	0.922	0.042	21.912	0
	SC	0.761	0.786	0.07	10.884	0
R2 adj	FeRR	0.527	0.542	0.128	4.112	0
	Feammox	0.908	0.912	0.048	19.107	0
	SC	0.746	0.773	0.074	10.043	0
f2	FeRR -> Feammox	2.478	3.284	2.884	0.859	0.39
	SC -> FeRR	1.248	1.532	0.856	1.459	0.145
	SC -> Feammox	0.666	1.035	1.128	0.59	0.555
	UI -> SC	3.182	4.37	2.999	1.061	0.289
AVE	FeRR	1	1	0	n/a	n/a
	Feammox	1	1	0	n/a	n/a
	SC	0.633	0.64	0.067	9.396	0
CR: rho_c	FeRR	1	1	0	n/a	n/a
	Feammox	1	1	0	n/a	n/a
	SC	0.892	0.889	0.039	23.049	0
CR: rho_a	FeRR	1	1	0	n/a	n/a
	Feammox	1	1	0	n/a	n/a
	SC	0.885	0.888	0.044	19.912	0
	UI	1	1	0	n/a	n/a
alfa cronbach	FeRR	1	1	0	n/a	n/a
	Feammox	1	1	0	n/a	n/a
	SC	0.84	0.83	0.063	13.38	0
Latent variable correlations	Feammox <-> FeRR	0.93	0.927	0.034	27.717	0
	SC <-> FeRR	0.745	0.749	0.092	8.087	0
	SC <-> Feammox	0.848	0.853	0.064	13.275	0
	UI <-> FeRR	0.594	0.606	0.143	4.162	0
	UI <-> Feammox	0.747	0.753	0.106	7.062	0
	UI <-> SC	0.872	0.885	0.052	16.795	0
HTMT		Original sample (O)	Sample mean (M)	0.025	0.975
	Feammox <-> FeRR	0.93	0.927	0.845	0.974
	SC <-> FeRR	0.806	0.799	0.584	0.945
	SC <-> Feammox	0.906	0.897	0.747	1.013
Seagrass: model fit
		Original sample (O)	Sample mean (M)	0.95	0.99
SRMR	Saturated model	0.123	0.083	0.126	0.156
	Estimated model	0.121	0.085	0.13	0.16
d_ULS	Saturated model	0.681	0.33	0.717	1.09
	Estimated model	0.656	0.348	0.755	1.156
d_G	Saturated model	1.035	n/a	114.011	n/a
	Estimated model	1.048	n/a	183.625	n/a
