# Supplementary material for: Regulation of ammonium loss under contrasting upwelling conditions: sensitivity of Feammox to environmental drivers
Source: Royal Society of Chemistry journal article supplement (doi:10.1039/d5em00257e), 2025-11-19
Supplement: d5em00257e2.pdf [file d5em00257e2.pdf]

## **Environmental Science: Processes & Impacts - Supplementary Material**

### **Regulation of ammonium loss under contrasting upwelling conditions: sensitivity of Feammox to environmental drivers**

Guillermo Samperio-Ramos<sup>a\*</sup>; Oscar Hernández-Sánchez<sup>a</sup>; Jorge A. Velásquez-Aristizábal<sup>ab</sup>, Víctor F. Camacho-Ibar<sup>a</sup>;  
Silvia Pajares<sup>c</sup>; Aaron Gutiérrez<sup>a</sup>; Ariadna Aldrich-Rodríguez<sup>a</sup>; Francisco J. Cervantes<sup>d</sup>

<sup>a</sup>. Nutrient Cycling in Marine Ecosystems (CiNEMa) Research Group. Instituto de Investigaciones Oceanológicas, Universidad Autónoma de Baja California, 22860 Ensenada, México. [guillermo.samperio@uabc.edu.mx](mailto:guillermo.samperio@uabc.edu.mx); [oskrgabo@gmail.com](mailto:oskrgabo@gmail.com); [velasquez.jorge@uabc.edu.mx](mailto:velasquez.jorge@uabc.edu.mx); [vcamacho@uabc.edu.mx](mailto:vcamacho@uabc.edu.mx); [aaron.gutierrez@uabc.edu.mx](mailto:aaron.gutierrez@uabc.edu.mx); [ariadna.aldrich@uabc.edu.mx](mailto:ariadna.aldrich@uabc.edu.mx)

<sup>b</sup>. Departamento de Oceanografía Física, Centro de Investigación Científica y de Educación Superior de Ensenada, 22860 Ensenada, México.

<sup>c</sup>. Unidad Académica de Ecología y Biodiversidad Acuática, Instituto de Ciencias del Mar y Limnología, Universidad Nacional Autónoma de México, 04510 Ciudad de México, México.

[spajares@cmarl.unam.mx](mailto:spajares@cmarl.unam.mx)

<sup>d</sup>. Laboratory for Research on Advanced Processes for Water Treatment, Engineering Institute, Campus Juriquilla, Universidad Nacional Autónoma de México, 76230 Querétaro, México.

[fcervantes@iingen.unam.mx](mailto:fcervantes@iingen.unam.mx)

*\*Corresponding author. E-mail address: [guillermo.samperio@uabc.edu.mx](mailto:guillermo.samperio@uabc.edu.mx) (G. Samperio-Ramos)*

## ▪ Supporting Methods

### ▪ *Anammox rates measured through isotopic tracer incubations.*

Potential anammox rates were determined through a slurry-based  $^{15}\text{N}$  isotope-tracing experiment<sup>1,2</sup>. The slurries were prepared as indicated for Feammox (See section 2.4 “*Isotopic tracer incubations*” in “*Material and Methods*”). Afterward, a  $^{15}\text{NO}_3^-$  (99.5 atom%,  $^{15}\text{N}$ ) stock solution was added to each vial, yielding a final concentration of 100  $\mu\text{M}$   $^{15}\text{N}$ . Subsequently, 200  $\mu\text{L}$  of saturated  $\text{ZnCl}_2$  solution was added to half of the vials with the objective of halting the reactions and establishing the initial samples. The remaining half of the slurries was further incubated for 8 h and treated as the final samples. The concentrations of  $^{29}\text{N}_2$  and  $^{30}\text{N}_2$  in the incubation vials were determined by a GasBench + Precon gas concentration system interfaced with a Delta V Plus Isotope-Ratio Mass Spectrometer (IRMS, Thermo-Scientific) at UC Davis Stable Isotope Facilities. The  $^{29}\text{N}_2$  and  $^{30}\text{N}_2$  production rates were calculated by the difference in  $^{29}\text{N}_2$  and  $^{30}\text{N}_2$  concentrations between the final and initial samples<sup>3,4</sup>. Then, the anammox rates were calculated based on Eq. (1).

$$R_A = (P_{29} - P_{30} \times (1 - F_N) \times F_N^{-1}) \rho_s \times h_s \quad (\text{Eq. 1})$$

where  $R_A$  ( $\text{mg} \cdot \text{N} \cdot \text{m}^{-2} \cdot \text{d}^{-1}$ ) represents the potential anammox rates. The  $P_{30}$  and  $P_{29}$  indicate the total  $^{30}\text{N}_2$  and  $^{29}\text{N}_2$  production rates ( $\mu\text{g} \text{N} \cdot \text{g}^{-1} \cdot \text{d}^{-1}$ ), respectively, and  $F_N$  is the fraction of  $^{15}\text{N}$  in  $\text{NO}_3^-$ , estimated from the concentrations of added  $^{15}\text{NO}_3^-$  and residual  $\text{NO}_3^-$  in the incubation slurries. The  $\rho_s$  and  $h_s$  refer to the density ( $\text{g} \cdot \text{cm}^{-3}$ ) and depth (5 cm) of sediments.

### ▪ *Contribution of Feammox to total $\text{NH}_4^+$ loss*

According to the reaction stoichiometry of Feammox and Anammox, 2 mol of  $\text{NH}_4^+$  are required to yield 1 mol of  $\text{N}_2$  through Feammox, while Anammox requires 1 mol of  $\text{NH}_4^+$  to generate 1 mol of  $\text{N}_2$  through Anammox<sup>1,5</sup>. Consequently, the contributions of both processes to  $\text{NH}_4^+$  loss were calculated based on the potential rates of both processes, as outlined in the following equations:

$$C_{Fe} = \frac{R_{Fe}}{R_{Fe} + R_A} \cdot 100 \quad (\text{Eq. 2})$$

$$C_A = \frac{R_A}{R_A + R_{Fe}} \cdot 100 \quad (\text{Eq. 3})$$

where  $C_{Fe}$  and  $C_A$  represent the contribution of Feammox and Anammox to  $\text{NH}_4^+$  loss, while  $R_{Fe}$  and  $R_A$  denote the potential rates of Feammox and Anammox, respectively.

### ▪ **Supporting results in sediment characteristics distribution**

The PERMANOVA results indicated that moisture significantly differed among stations ( $P < 0.001$ ;  $r^2 = 0.44$ ) and between bottom types ( $P < 0.001$ ;  $r^2 = 0.45$ ), but not between upwelling conditions (Table S3). The highest mean moisture value (86%) was recorded in 3S. The Station factor notably accounted for the greatest degree of variation ( $P < 0.001$ ;  $r^2 = 0.88$ ) in granulometry (Table S3), with 1B exhibiting the highest proportion of sand (82–91%) and the lowest (21–28%) in station 3.

Significant differences ( $P < 0.001$ ) in the  $\text{NH}_4^+$  concentration were also found in the interactions of Upwelling-conditions  $\times$  Station ( $r^2 = 0.12$ ), Station  $\times$  Bottom-type ( $r^2 = 0.08$ ), and Upwelling-conditions  $\times$  Station  $\times$  Bottom-type ( $r^2 = 0.07$ ). Urea levels in the sediments ranged from  $0.09 \pm 0.02$  to  $0.58 \pm 0.06 \mu\text{g N} \cdot \text{g}^{-1}$ . The effects of Station ( $P < 0.001$ ;  $r^2 = 0.44$ ) and Bottom-type ( $P < 0.001$ ;  $r^2 = 0.15$ ) on the urea concentration were observed. The PERMANOVA also revealed that the interactions between both factors significantly affected the distribution of urea ( $P < 0.001$ ;  $r^2 = 0.21$ ), with a more pronounced effect in seagrass sediments (pairwise test:  $P < 0.05$ ).

Upwelling-conditions ( $P < 0.05$ ), Bottom-type ( $P < 0.001$ ), and the interaction of Upwelling-conditions  $\times$  Station ( $P < 0.05$ ) contributed 6%, 15%, and 7% to the total variation of SOC, respectively. The C:N ratio was different between upwelling conditions ( $P < 0.001$ ;  $r^2 = 0.26$ ) and bottom types ( $P < 0.05$ ;  $r^2 = 0.09$ ), with significant interaction of both factors ( $P < 0.05$ ;  $r^2 = 0.08$ ). Although the CCHO concentrations in vegetated sediments ( $382.6 \pm 146.8 \mu\text{g C} \cdot \text{g}^{-1}$ ) were consistently higher (pairwise test:  $P < 0.001$ ) than those in bare bottoms ( $108.1 \pm 24.3 \mu\text{g C} \cdot \text{g}^{-1}$ ) across all stations and both upwelling conditions, the most minor differences were noted at station 1 during HB (Table S2). In addition, MPB varied significantly among stations ( $P < 0.001$ ;  $r^2 = 0.37$ ) with a significant interaction of Station  $\times$  Upwelling-conditions ( $P < 0.05$ ;  $r^2 = 0.16$ ).

▪ **Tables:**

▪ **Table S1. Thermal cycling conditions and protocols used in the qPCR. All reactions\* were performed in triplicate.**

| Target gene                 | Primer set | Sequence (5'-3')      | Thermal profile*        | Efficiencies | Reference |
|-----------------------------|------------|-----------------------|-------------------------|--------------|-----------|
| 16S rRNA                    | Geo564F    | AAGCGTTGTTTCGGAWTTAT  | 40x(95°C - 30 s, 57°C - | 95-110 %     | 6         |
| <i>Geobacteraceae</i>       | Geo840R    | GGCACTGCAGGGGTCAATA   | 30 s, 72°C - 30 s)      |              |           |
| 16S rRNA                    | Acm342F    | GCAATGGGGGAAACCCTGAC  | 40x(95°C - 30 s, 57°C - | 113-118 %    | 7         |
| <i>Acidomicrobiaceae</i> A6 | Acm439R    | ACCGTCAATTTTCGTCCCTGC | 30 s, 72°C - 30 s)      |              |           |

\*Thermal conditions started at 95°C for 5 min and finished at 72°C for 5 min. Reactions finished with a melting curve starting at 60°C and increasing by 1°C until 95°C to verify the amplicon specificity.

Table S2. Sediment characteristics along Bahía de San Quintin under low BEUTI (LB) and high BEUTI (HB) conditions.

| Stations | Moisture (%)    |                 | Granulometry (% sand) |                 | pH (NBS)       |                | <sup>a</sup> SOC (mg C g <sup>-1</sup> ) |                 | <sup>b</sup> CHO (μg C g <sup>-1</sup> ) |                   | C:N (mol C : mol N) |                 | <sup>c</sup> MPB (μg C g <sup>-1</sup> ) |                   | NH <sub>4</sub> <sup>+</sup> (μg N g <sup>-1</sup> ) |                 | Urea (μg N g <sup>-1</sup> ) |                | <sup>d</sup> NO <sub>x</sub> <sup>-</sup> (μg N g <sup>-1</sup> ) |                | <sup>e</sup> Fe(III) (mg Fe g <sup>-1</sup> ) |                | <sup>f</sup> Mn(IV) (mg Mn g <sup>-1</sup> ) |                |
|----------|-----------------|-----------------|-----------------------|-----------------|----------------|----------------|------------------------------------------|-----------------|------------------------------------------|-------------------|---------------------|-----------------|------------------------------------------|-------------------|------------------------------------------------------|-----------------|------------------------------|----------------|-------------------------------------------------------------------|----------------|-----------------------------------------------|----------------|----------------------------------------------|----------------|
|          | LB              | HB              | LB                    | HB              | LB             | HB             | LB                                       | HB              | LB                                       | HB                | LB                  | HB              | LB                                       | HB                | LB                                                   | HB              | LB                           | HB             | LB                                                                | HB             | LB                                            | HB             | LB                                           | HB             |
| 1B       | 35.53<br>(3.67) | 42.50<br>(3.12) | 90.75<br>(0.62)       | 81.70<br>(4.71) | 8.01<br>(0.02) | 7.85<br>(0.01) | 3.10<br>(0.06)                           | 5.43<br>(0.38)  | 72.08<br>(6.05)                          | 109.06<br>(19.53) | 10.05<br>(0.04)     | 7.31<br>(0.84)  | 202.36<br>(35.97)                        | 309.24<br>(33.58) | 4.01<br>(0.28)                                       | 9.16<br>(0.73)  | 0.09<br>(0.02)               | 0.21<br>(0.03) | 0.35<br>(0.03)                                                    | 1.06<br>(0.21) | 2.95<br>(0.53)                                | 3.46<br>(0.69) | 0.09<br>(0.02)                               | 0.11<br>(0.01) |
| 1S       | 61.36<br>(1.78) | 65.08<br>(4.65) | 63.19<br>(0.85)       | 71.41<br>(3.68) | 8.04<br>(0.02) | 7.89<br>(0.03) | 6.73<br>(0.98)                           | 8.55<br>(0.32)  | 299.01<br>(9.39)                         | 216.64<br>(21.43) | 10.89<br>(0.47)     | 12.02<br>(0.86) | -                                        | -                 | 9.75<br>(0.98)                                       | 11.67<br>(2.09) | 0.14<br>(0.06)               | 0.13<br>(0.04) | 0.26<br>(0.02)                                                    | 0.84<br>(0.08) | 2.40<br>(0.28)                                | 1.43<br>(0.76) | 0.12<br>(0.02)                               | 0.10<br>(0.01) |
| 2B       | 50.29<br>(0.50) | 49.88<br>(5.29) | 68.01<br>(4.28)       | 74.60<br>(2.31) | 8.06<br>(0.04) | 8.01<br>(0.02) | 7.49<br>(1.34)                           | 5.91<br>(0.85)  | 126.47<br>(9.81)                         | 121.88<br>(14.97) | 11.44<br>(1.13)     | 8.69<br>(0.33)  | 250.35<br>(41.96)                        | 269.23<br>(27.64) | 6.10<br>(0.64)                                       | 6.59<br>(1.71)  | 0.20<br>(0.02)               | 0.25<br>(0.03) | 0.11<br>(0.02)                                                    | 0.62<br>(0.15) | 4.97<br>(0.56)                                | 4.42<br>(0.68) | 0.15<br>(0.02)                               | 0.14<br>(0.03) |
| 2S       | 72.57<br>(1.67) | 71.21<br>(0.69) | 55.84<br>(3.45)       | 63.06<br>(1.34) | 8.08<br>(0.05) | 7.95<br>(0.03) | 9.90<br>(1.14)                           | 10.05<br>(0.55) | 320.78<br>(22.47)                        | 274.06<br>(38.79) | 10.27<br>(0.18)     | 9.77<br>(0.53)  | -                                        | -                 | 18.89<br>(0.26)                                      | 16.84<br>(1.49) | 0.31<br>(0.05)               | 0.26<br>(0.04) | 0.38<br>(0.03)                                                    | 0.59<br>(0.07) | 4.84<br>(1.10)                                | 4.19<br>(0.52) | 0.15<br>(0.02)                               | 0.17<br>(0.04) |
| 3B       | 68.11<br>(2.27) | 67.23<br>(6.24) | 25.12<br>(1.77)       | 21.29<br>(1.63) | 8.19<br>(0.05) | 8.21<br>(0.02) | 10.47<br>(0.80)                          | 11.50<br>(1.50) | 115.60<br>(4.69)                         | 104.38<br>(6.85)  | 11.63<br>(0.71)     | 9.51<br>(0.76)  | 107.00<br>(30.41)                        | 120.19<br>(10.80) | 5.28<br>(0.72)                                       | 10.33<br>(0.95) | 0.22<br>(0.02)               | 0.25<br>(0.04) | 0.25<br>(0.05)                                                    | 0.32<br>(0.07) | 4.07<br>(0.38)                                | 3.82<br>(0.79) | 0.21<br>(0.04)                               | 0.19<br>(0.01) |
| 3S       | 83.03<br>(0.77) | 86.06<br>(1.38) | 28.23<br>(2.06)       | 23.81<br>(3.02) | 8.15<br>(0.03) | 8.16<br>(0.04) | 18.50<br>(1.44)                          | 22.83<br>(1.27) | 535.15<br>(51.36)                        | 604.80<br>(42.27) | 10.63<br>(0.71)     | 10.57<br>(0.63) | -                                        | -                 | 16.02<br>(3.70)                                      | 25.25<br>(4.33) | 0.58<br>(0.06)               | 0.47<br>(0.02) | 0.37<br>(0.13)                                                    | 0.41<br>(0.05) | 4.37<br>(0.46)                                | 4.75<br>(0.63) | 0.18<br>(0.03)                               | 0.15<br>(0.04) |

Note: <sup>a</sup>SOC: sediment organic carbon; <sup>b</sup>CCHO: soluble carbohydrates; <sup>c</sup>MPB: microphytobenthos biomass; <sup>d</sup>NO<sub>x</sub><sup>-</sup>: nitrate + nitrite; <sup>e</sup>Fe(III): microbiologically reducible iron; <sup>f</sup>Mn(IV): microbiologically reducible manganese.

Table S3. Results of three-way PERMANOVA tests for differences in sediment characteristics among Upwelling conditions (UC), stations (St), and bottom type (BT).

| Source                        | Df | Moisture |                | Granulometry |                | pH     |                | SOC    |                | CCHO    |                | C:N    |                | MPB    |                | NH <sub>4</sub> <sup>+</sup> |                | Urea   |                | NO <sub>2</sub> <sup>-</sup> |                | Fe(III) |                | Mn(IV) |                |
|-------------------------------|----|----------|----------------|--------------|----------------|--------|----------------|--------|----------------|---------|----------------|--------|----------------|--------|----------------|------------------------------|----------------|--------|----------------|------------------------------|----------------|---------|----------------|--------|----------------|
|                               |    | F        | R <sup>2</sup> | F            | R <sup>2</sup> | F      | R <sup>2</sup> | F      | R <sup>2</sup> | F       | R <sup>2</sup> | F      | R <sup>2</sup> | F      | R <sup>2</sup> | F                            | R <sup>2</sup> | F      | R <sup>2</sup> | F                            | R <sup>2</sup> | F       | R <sup>2</sup> | F      | R <sup>2</sup> |
| UC                            | 1  | 1.3      | 0.01           | 0.5          | 0.00           | 30.3*  | 0.20           | 12.3** | 0.06           | 0.0     | 0.00           | 16.4** | 0.26           | 3.2    | 0.06           | 50.9**                       | 0.16           | 0.2    | 0.00           | 41.6**                       | 0.37           | 0.4     | 0.00           | 0.1    | 0.00           |
| St                            | 2  | 65.7**   | 0.44           | 387.8**      | 0.88           | 41.9** | 0.56           | 59.4** | 0.58           | 3.1     | 0.06           | 1.5    | 0.05           | 12.6** | 0.32           | 2.8                          | 0.04           | 40.0** | 0.44           | 9.2*                         | 0.16           | 12.6**  | 0.45           | 21.3** | 0.43           |
| BT                            | 1  | 134.8**  | 0.45           | 28.9**       | 0.03           | 0.0    | 0.00           | 30.5** | 0.15           | 390.8** | 0.47           | 5.5*   | 0.09           | -      | -              | 230.7**                      | 0.47           | 26.3** | 0.15           | 0.2                          | 0.00           | 0.4     | 0.01           | 0.2    | 0.00           |
| UCxSt                         | 2  | 0.9      | 0.01           | 3.4          | 0.01           | 3.7*   | 0.05           | 8.0*   | 0.07           | 1.3     | 0.00           | 2.5    | 0.07           | 8.8*   | 0.17           | 28.6**                       | 0.12           | 1.6    | 0.01           | 10.1**                       | 0.18           | 0.3     | 0.01           | 1.6    | 0.03           |
| UCxBT                         | 1  | 0.0      | 0.00           | 2.9          | 0.01           | 0.1    | 0.00           | 1.1    | 0.00           | 0.2     | 0.00           | 4.8*   | 0.08           | -      | -              | 2.3                          | 0.01           | 8.8*   | 0.06           | 2.0                          | 0.02           | 0.3     | 0.01           | 4.3    | 0.06           |
| StxBT                         | 2  | 1.4      | 0.01           | 14.8**       | 0.03           | 0.6    | 0.01           | 1.4    | 0.01           | 45.0**  | 0.26           | 2.1    | 0.07           | -      | -              | 19.3**                       | 0.08           | 18.3** | 0.21           | 2.9                          | 0.05           | 2.1     | 0.10           | 3.4    | 0.05           |
| UCxStxBT                      | 2  | 0.4      | 0.00           | 3.2          | 0.00           | 1.7    | 0.02           | 0.6    | 0.01           | 9.3**   | 0.14           | 0.7    | 0.02           | -      | -              | 14.5**                       | 0.07           | 0.1    | 0.00           | 0.6                          | 0.01           | 0.9     | 0.03           | 2.8    | 0.09           |
| Residuals                     | 24 |          | 0.08           |              | 0.04           |        | 0.16           |        | 0.12           |         | 0.07           |        | 0.37           |        | 0.45           |                              | 0.05           |        | 0.13           |                              | 0.21           |         | 0.39           |        | 0.34           |
| Pairwise post-hoc comparisons |    |          |                |              |                |        |                |        |                |         |                |        |                |        |                |                              |                |        |                |                              |                |         |                |        |                |
| UC                            |    | -        |                | -            |                | LB>HB  |                | HB>LB  |                | -       |                | LB>HB  |                | -      |                | HB>LB                        |                | -      |                | HB>LB                        |                | -       |                | -      |                |
| St                            |    | 3>2>1    |                | 1>2>3        |                | 3>2>1  |                | 3>2>1  |                | -       |                | -      |                | 1=2>3  |                | -                            |                | 3>2>1  |                | 1=2>3                        |                | 3=2>1   |                | 3=2>1  |                |
| BT                            |    | S>B      |                | B>S          |                | -      |                | S>B    |                | S>B     |                | S>B    |                | -      |                | S>B                          |                | S>B    |                | -                            |                | -       |                | -      |                |

Note: LB: Low BEUTI; HB: High BEUTI; B: Bare sediments; S: Seagrass sediments; \* and \*\* denote statistical significance at  $P < 0.05$  and  $P < 0.001$ , respectively.

**Table S4. Results of three-way PERMANOVA tests for differences in dissimilatory Fe(III) reduction rates (FeRR) and Feammox rates among upwelling condition (UC), stations (St), and bottom type (BT).**

| Source           | <i>df</i> | FeRR          |                | Feammox       |                |
|------------------|-----------|---------------|----------------|---------------|----------------|
|                  |           | <i>F</i>      | R <sup>2</sup> | <i>F</i>      | R <sup>2</sup> |
| UC               | 1         | 0.1           | 0.0            | 0.4           | 0.01           |
| St               | 2         | <b>21.3**</b> | <b>0.42</b>    | <b>37.8**</b> | <b>0.34</b>    |
| BT               | 1         | 0.2           | 0.01           | 0.7           | 0.02           |
| UCxSt            | 2         | 1.6           | 0.03           | 1.8           | 0.03           |
| UCxBT            | 1         | <b>5.8*</b>   | <b>0.07</b>    | <b>8.2**</b>  | <b>0.10</b>    |
| StxBT            | 2         | <b>7.4**</b>  | <b>0.12</b>    | <b>17.4**</b> | <b>0.25</b>    |
| UCxStxBT         | 2         | 2.3           | 0.03           | <b>6.5*</b>   | <b>0.08</b>    |
| <i>Residuals</i> | 24        | 0.32          |                | 0.17          |                |
| UC               |           | -             |                | -             |                |
| St               |           | 3 = 2 > 1     |                | 3 = 2 > 1     |                |
| BT               |           | -             |                | -             |                |

Note: LB: Low BEUTI; HB: High BEUTI; B: Bare sediments; S: Seagrass sediments; \* and \*\* indicate statistical significance at  $P < 0.05$  and  $P < 0.001$ , respectively.

**Table S5. Results of Monte Carlo permutation tests employed to analyze the environmental characteristics that contributed to the RDA models (Fig. 3).**

| Environmental characteristics | Bare sediments |                | Seagrass sediments |                |
|-------------------------------|----------------|----------------|--------------------|----------------|
|                               | Explains rate  | <i>p-value</i> | Explains rate      | <i>p-value</i> |
| BEUTI                         | <b>12.7</b>    | <b>0.009</b>   | <b>10.8</b>        | <b>0.017</b>   |
| CCHO                          | <b>15.1</b>    | <b>0.002</b>   | <b>9.2</b>         | <b>0.025</b>   |
| C:N                           | 1.5            | 0.539          | 2.0                | 0.611          |
| d <sub>m</sub>                | <b>7.9</b>     | <b>0.046</b>   | <b>8.5</b>         | <b>0.040</b>   |
| Fe(III)                       | <b>16.7</b>    | <b>0.001</b>   | <b>22.1</b>        | <b>0.001</b>   |
| MPB                           | <b>10.2</b>    | <b>0.020</b>   | -                  | -              |
| Mn(IV)                        | <b>8.4</b>     | <b>0.031</b>   | 4.5                | 0.198          |
| μ <sub>m</sub>                | 4.3            | 0.138          | 3.8                | 0.257          |
| NH <sub>4</sub> <sup>+</sup>  | <b>9.0</b>     | <b>0.027</b>   | 5.7                | 0.072          |
| NO <sub>x</sub> <sup>-</sup>  | <b>8.1</b>     | <b>0.034</b>   | <b>6.9</b>         | <b>0.048</b>   |
| pH                            | 1.6            | 0.642          | 1.3                | 0.805          |
| φ <sub>s</sub>                | 3.0            | 0.295          | 0.8                | 0.911          |
| SOC                           | 2.3            | 0.470          | <b>15.9</b>        | <b>0.001</b>   |
| T                             | <b>11.7</b>    | <b>0.015</b>   | <b>7.2</b>         | <b>0.045</b>   |
| Urea                          | <b>14.2</b>    | <b>0.006</b>   | <b>11.6</b>        | <b>0.012</b>   |

Note: BEUTI: Biologically Effective Upwelling Transport Index ( $\text{mmol NO}_3^- \cdot \text{m}^{-1} \cdot \text{s}^{-1}$ ); CCHO: soluble carbohydrates ( $\mu\text{g C} \cdot \text{g}^{-1}$ ); d<sub>m</sub>: station distance from the inlet (km); Fe(III): microbiologically reducible iron ( $\text{mg Fe} \cdot \text{g}^{-1}$ ); MPB: microphytobenthos biomass ( $\mu\text{g C} \cdot \text{g}^{-1}$ ); Mn(IV): microbiologically reducible manganese ( $\text{mg Mn} \cdot \text{g}^{-1}$ ); μ<sub>m</sub>: moisture (%); NO<sub>x</sub><sup>-</sup>: nitrate + nitrite ( $\mu\text{g N} \cdot \text{g}^{-1}$ ); φ<sub>s</sub>: granulometry as proportion of sand (%); SOC: sediment organic carbon ( $\mu\text{g C} \cdot \text{g}^{-1}$ ); T: temperature (°C). Bold letters imply statistical significance at the  $p < 0.05$  level.

▪ **Figures:**



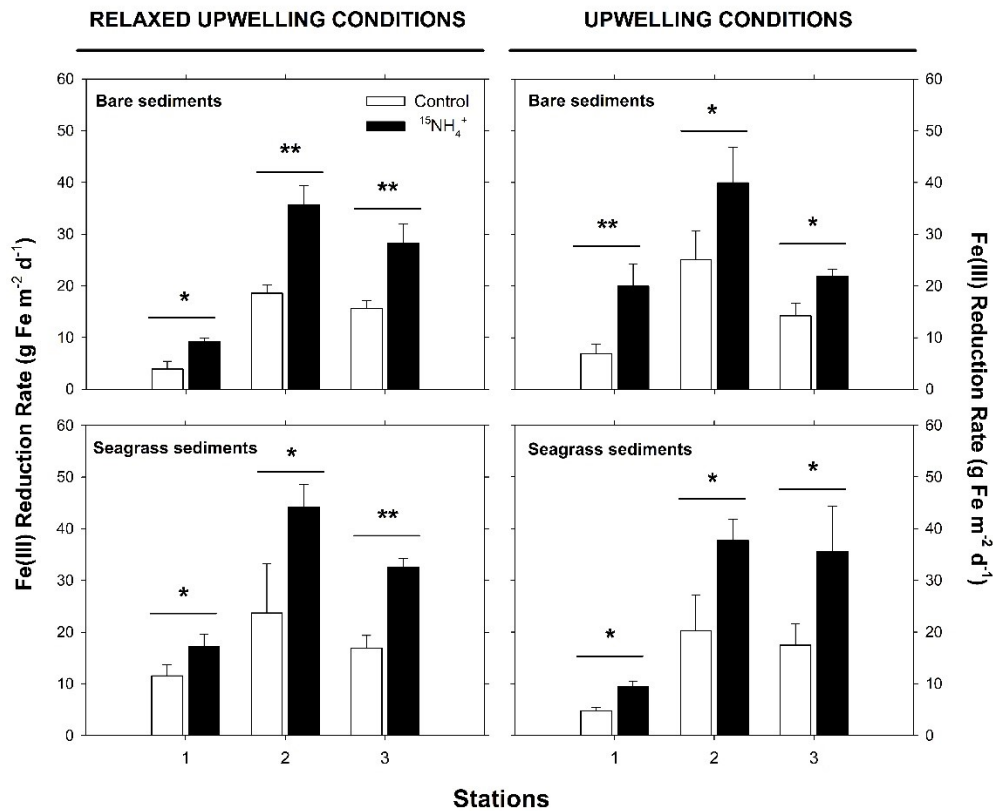

**Figure S1. Fe(III) reduction rates (g Fe · m<sup>-2</sup> · d<sup>-1</sup>) measured through isotope tracer incubations in both bare and seagrass sediments from Bahia de San Quintin, under upwelling-relaxed and upwelling conditions. Asterisks above the horizontal line denote statistically significant differences (\* at the level 0.05 and \*\* at the level 0.001) between treatments (control and <sup>15</sup>NH<sub>4</sub><sup>+</sup> addition), as determined by the t-student test. Values are the means and error bars represent standard errors (n=3).**

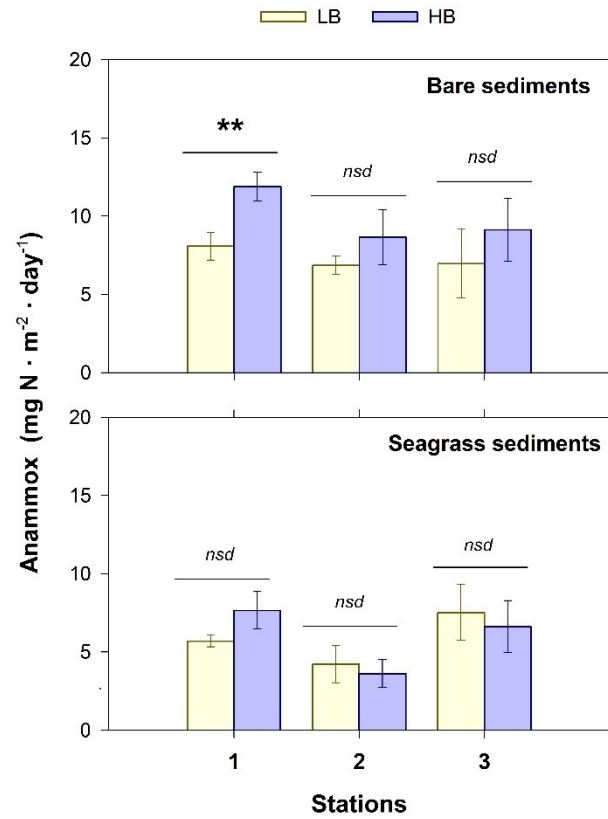

**Figure S2.** Seasonal changes on potential Anammox rates measured through isotope tracer incubations in bare and seagrass sediments from Bahia de San Quintin. Asterisks above the horizontal line denote statistically significant differences (\* at 0.05 and \*\* at 0.001 level, respectively) between upwelling and relaxed upwelling conditions (n=3).

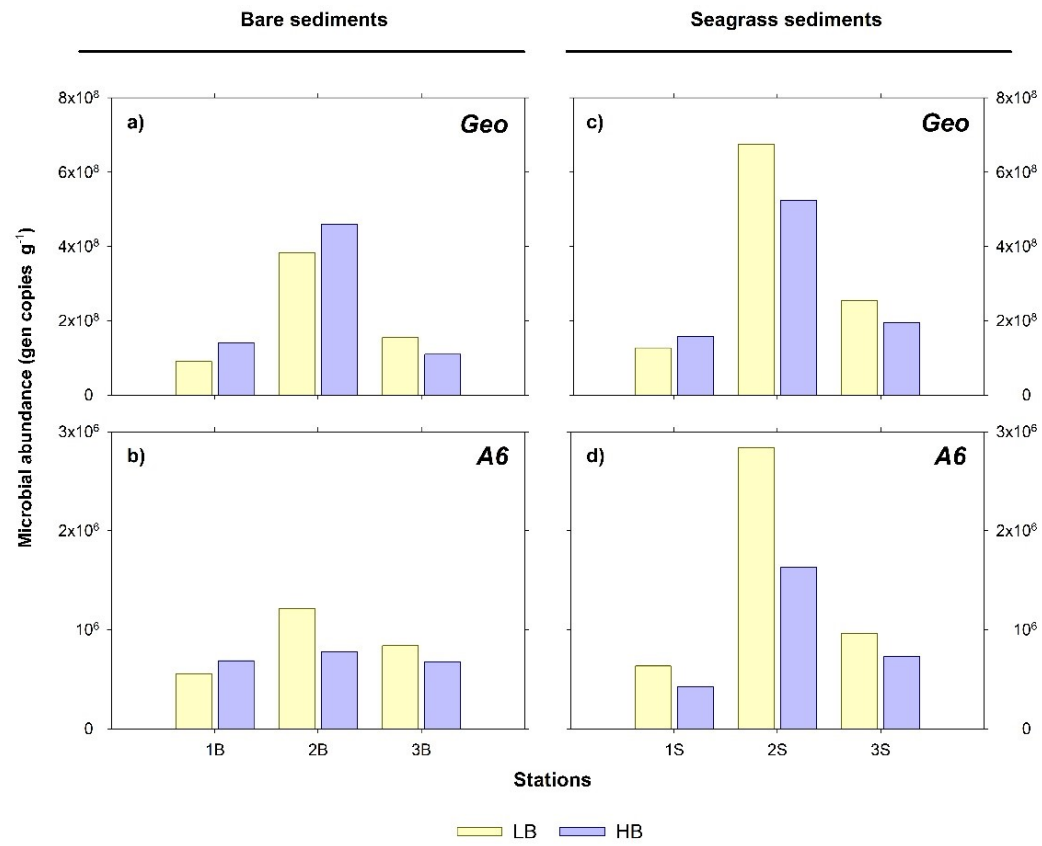

**Figure S3. Gene copy numbers of *Geobacteraceae* spp (*Geo*) and *Acidimicrobiaceae* A6 spp quantified through qPCR in bare and seagrass sediments under relaxed (LB) and favourable (HB) upwelling conditions.**

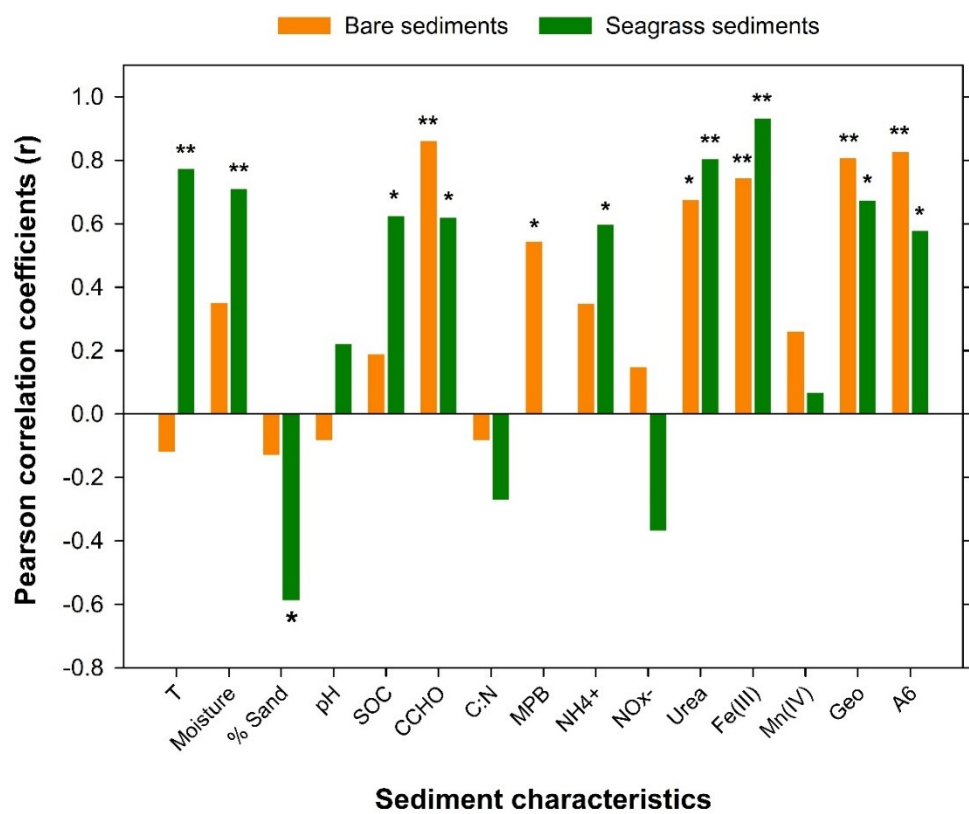

**Figure S4.** The relationship between Feammox rates and sediment characteristics in Bahia de San Quintin. \* and \*\* denote statistically significant differences  $P < 0.05$  and  $P < 0.001$ , respectively.

▪ **REFERENCES:**

- 1 B. Thamdrup and T. Dalsgaard, *Appl Environ Microbiol*, 2002, **68**, 1312–1318.
- 2 L. Hou, Y. Zheng, M. Liu, J. Gong, X. Zhang, G. Yin and L. You, *J Geophys Res Biogeosci*, 2013, **118**, 1237–1246.
- 3 F. Deng, L. Hou, M. Liu, Y. Zheng, G. Yin, X. Li, X. Lin, F. Chen, J. Gao and X. Jiang, *J Geophys Res Biogeosci*, 2015, **120**, 1521–1531.
- 4 Fozia, Y. Zheng, L. Hou, Z. Zhang, D. Gao, G. Yin, P. Han, H. Dong, X. Liang, Y. Yang and M. Liu, *Mar Pollut Bull*, 2020, **153**, 110971.
- 5 W. H. Yang, K. A. Weber and W. L. Silver, *Nature Publishing Group*, 2012, preprint, DOI: 10.1038/ngeo1530.
- 6 D. E. Cummings, O. L. Snoeyenbos-West, D. T. Newby, A. M. Niggemyer, D. R. Lovley, L. A. Achenbach and R. F. Rosenzweig, *Microbial Ecology*, 2003, **46**, 257–269.
- 7 S. Huang and P. R. Jaffé, 2015, preprint, DOI: 10.5194/bg-12-769-2015.
